# Supplementary material
Source: publisher figshare collection journal article supplement (https://scielo.figshare.com/articles/dataset/_/5667346)
Supplement: Supplementary file 1 [file Table_1.xls]

## Sheet: Table_1
<b>Parameters</b>	<b>Reference</b>
Power	30mW
Wavelength	660nm
Mode of action	Continuous
Output area	0.03cm<sup>2</sup>
Tip diameter	0.01cm<sup>2</sup>
Energy density	0.5 and 1.0J/cm<sup>2</sup>
Irradiation time	16 seconds (0.5J/cm<sup>2</sup>) and 33 seconds (1.0J/cm<sup>2</sup>)
Application mode	Probe was directed perpendicular to each plate at a distance of 0.5cm from the cells
